# Supplementary material for: Comparative analysis of the human saliva microbiome from different climate zones: Alaska, Germany, and Africa
Source: PubMed Central journal article supplement (PMC4272767; doi:10.1186/s12866-014-0316-1), 2014-12-17

5 10 15 20 25 30 35 40 45 50 55 60 65 70 75 80 85 90 95 100 105 110 115 120

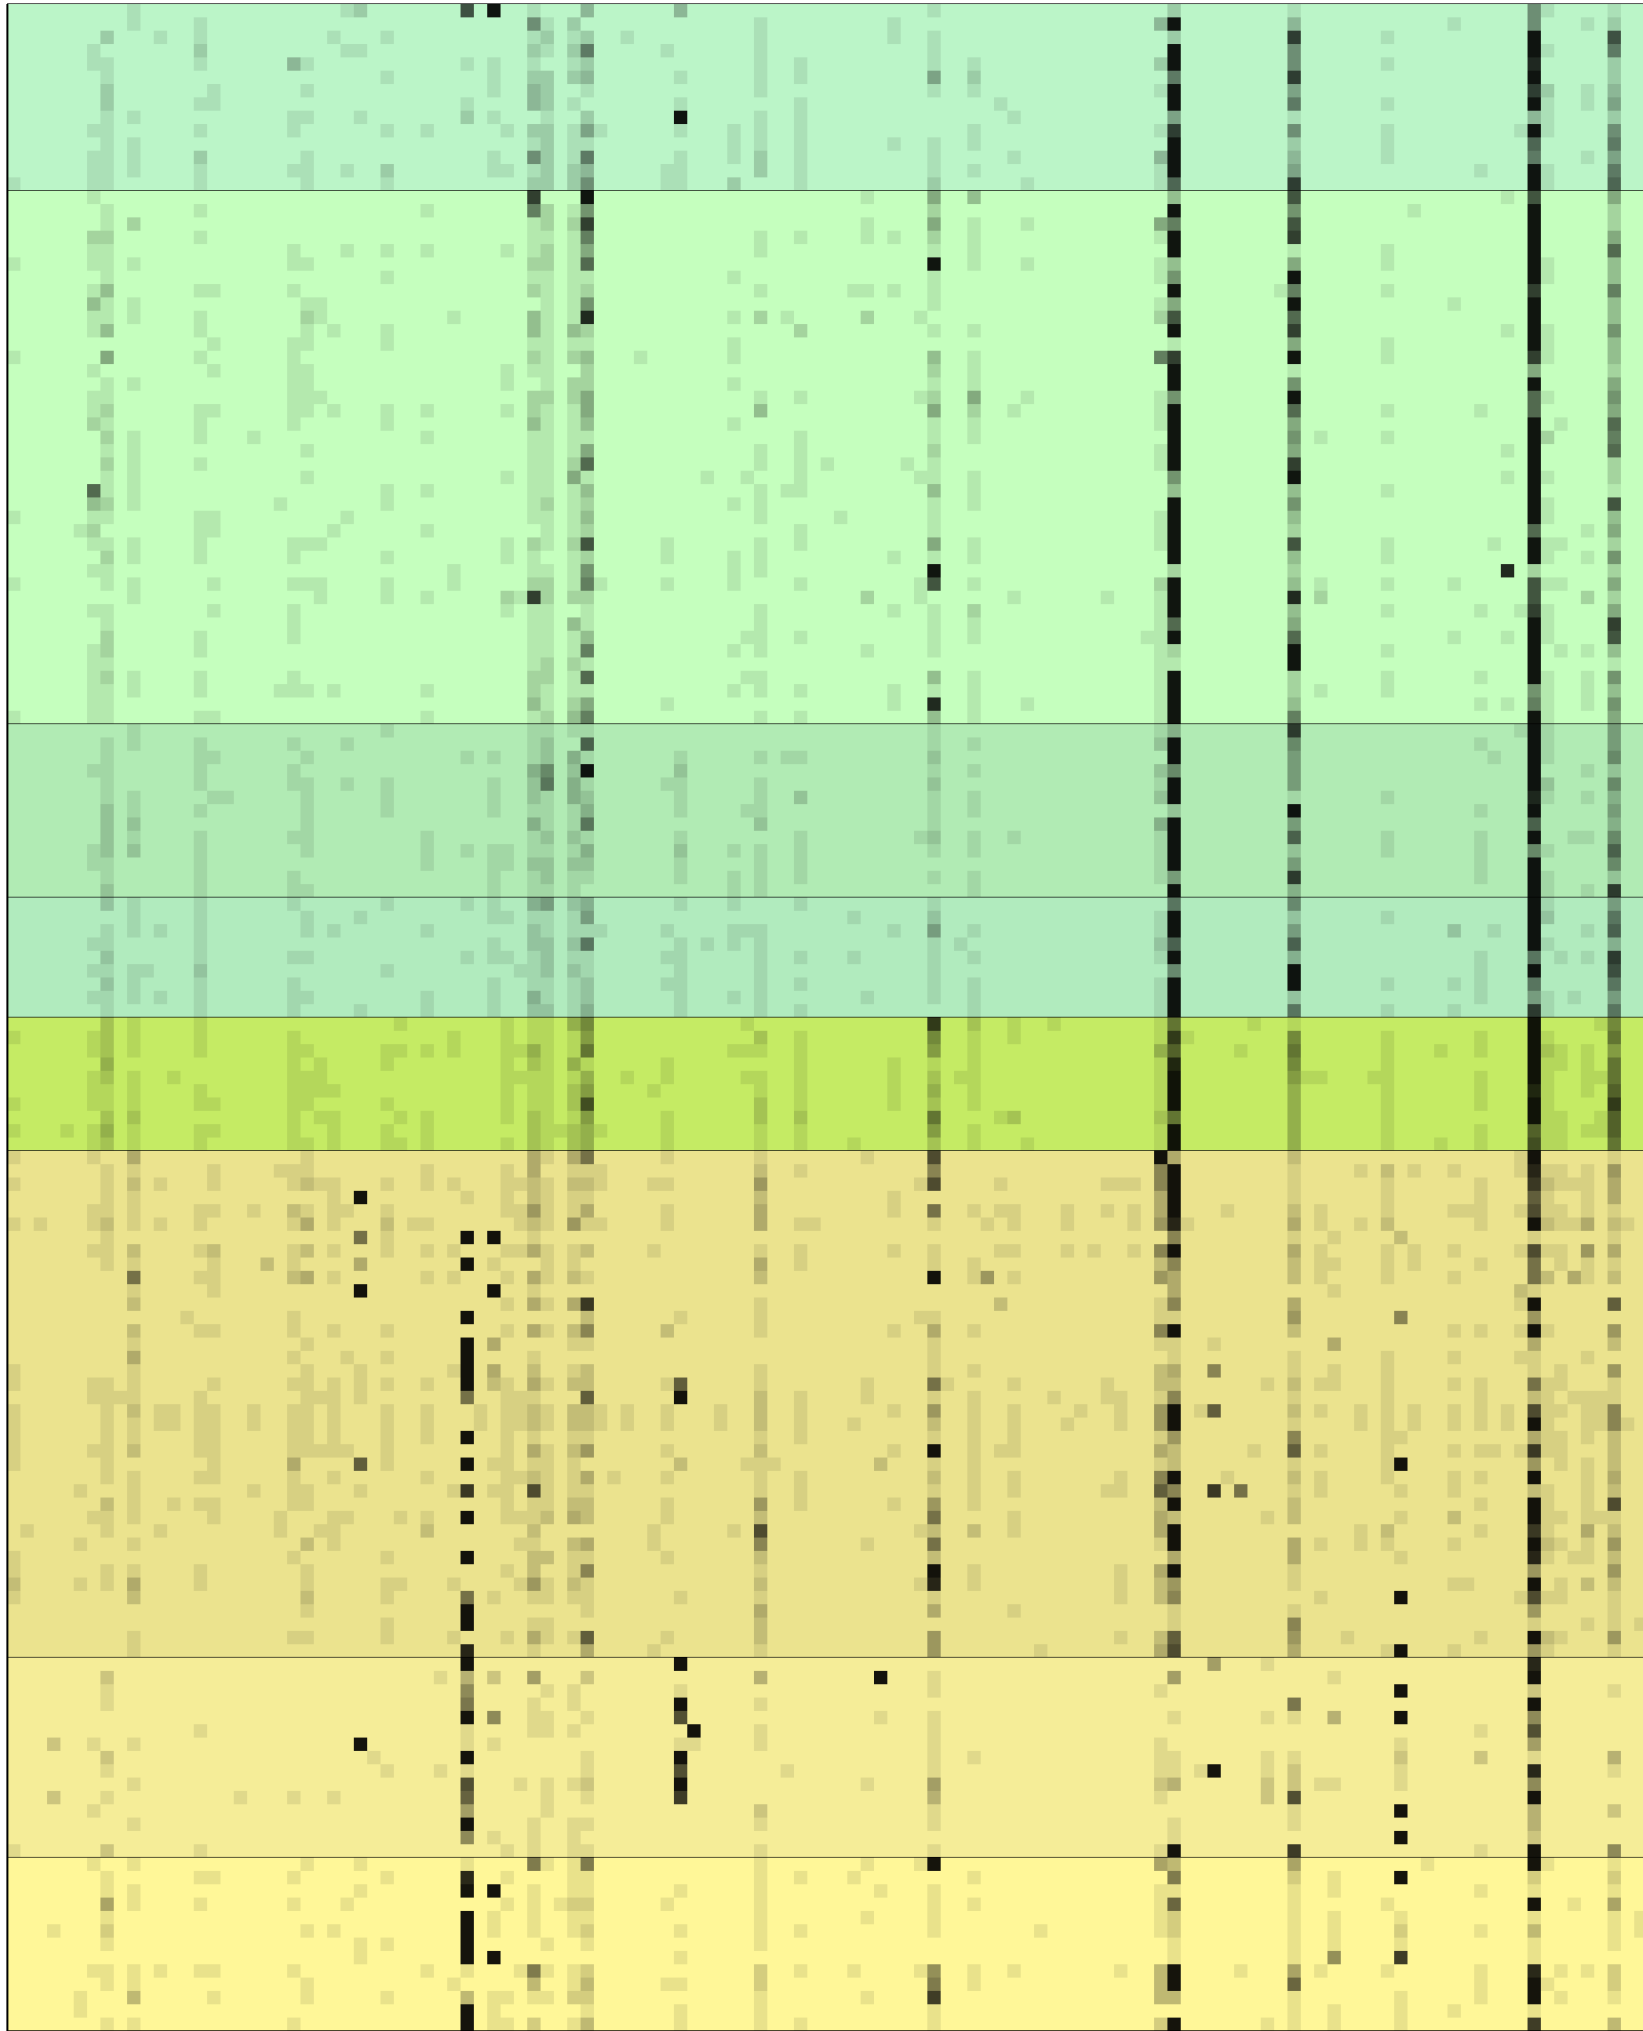

Atqasuk  
Barrow  
Nuiqsut  
Wainwright  
German  
BP  
DRC  
SL

Frequency

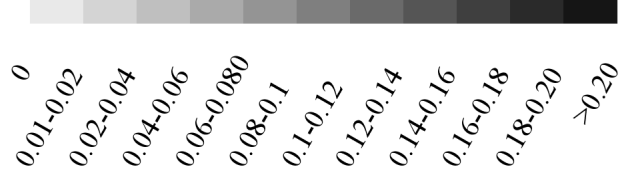

Supplement: 12866_2014_316_MOESM3_ESM.pdf [file 12866_2014_316_MOESM3_ESM.pdf]
