# Supplementary material for: Comparative analysis of the human saliva microbiome from different climate zones: Alaska, Germany, and Africa
Source: PubMed Central journal article supplement (PMC4272767; doi:10.1186/s12866-014-0316-1), 2014-12-17
Supplement: 12866_2014_316_MOESM4_ESM.pdf [file 12866_2014_316_MOESM4_ESM.pdf]

Table S1-a. Genera abundance difference among 4 Alaskan groups

\*Here we take P value < 0.0005 as significant threshold, and only calculated for common genera which means abundance frequency > 0.5% in at least one group

| Genera                    | Frequency |        |         |            | Significant (P value) |
|---------------------------|-----------|--------|---------|------------|-----------------------|
|                           | Atgasuk   | Barrow | Nuiksut | Wainwright |                       |
| Actinobacillus            | 0.005     | 0.010  | 0.001   | 0.001      | 0.0000*               |
| Actinomyces               | 0.011     | 0.017  | 0.017   | 0.019      | <b>0.0989</b>         |
| Aggregatibacter           | 0.004     | 0.004  | 0.006   | 0.004      | <b>0.3344</b>         |
| Atopobium                 | 0.010     | 0.003  | 0.008   | 0.011      | 0.0000*               |
| Campylobacter             | 0.006     | 0.004  | 0.002   | 0.004      | <b>0.3048</b>         |
| Enterobacter              | 0.011     | 0.000  | 0.001   | 0.001      | 0.0000*               |
| Escherichia               | 0.028     | 0.000  | 0.005   | 0.005      | 0.0000*               |
| Fusobacterium             | 0.035     | 0.022  | 0.020   | 0.029      | <b>0.0005</b>         |
| Gemella                   | 0.022     | 0.014  | 0.030   | 0.024      | 0.0000*               |
| Granulicatella            | 0.015     | 0.017  | 0.021   | 0.013      | <b>0.0796</b>         |
| Haemophilus               | 0.046     | 0.066  | 0.039   | 0.042      | 0.0000*               |
| Klebsiella                | 0.067     | 0.000  | 0.010   | 0.008      | 0.0000*               |
| Leptotrichia              | 0.010     | 0.005  | 0.006   | 0.005      | <b>0.0219</b>         |
| Megasphaera               | 0.005     | 0.003  | 0.007   | 0.004      | <b>0.0235</b>         |
| Neisseria                 | 0.013     | 0.046  | 0.014   | 0.020      | 0.0000*               |
| Oribacterium              | 0.004     | 0.008  | 0.007   | 0.004      | <b>0.0312</b>         |
| Porphyromonas             | 0.012     | 0.010  | 0.012   | 0.010      | <b>0.7502</b>         |
| Prevotella                | 0.276     | 0.253  | 0.307   | 0.297      | 0.0000*               |
| Rothia                    | 0.087     | 0.121  | 0.097   | 0.115      | 0.0000*               |
| Streptococcus             | 0.221     | 0.296  | 0.281   | 0.242      | 0.0000*               |
| TM7_genera_incertae_sedis | 0.006     | 0.004  | 0.007   | 0.006      | <b>0.2026</b>         |
| Veillonella               | 0.074     | 0.070  | 0.080   | 0.109      | 0.0000*               |

Table S1-b. Genera abundance difference between Alaskans, Germans, and Africans

\*Here we take P value < 0.0005 as significant threshold, and only calculated for common genera which means abundance frequency > 0.5% in at least one group

| Genera                        | Frequency |        |         |               | Significant (P value) |                       |                      |
|-------------------------------|-----------|--------|---------|---------------|-----------------------|-----------------------|----------------------|
|                               | Alaskan   | German | African | 3 groups      | Alaskans vs. Germans  | Alaskans vs. Africans | Germans vs. Africans |
| Actinobacillus                | 0.0066    | 0.0049 | 0.0011  | 0.0000*       | <b>0.2253</b>         | 0.0000*               | 0.0000*              |
| Actinomyces                   | 0.0162    | 0.0320 | 0.0074  | 0.0000*       | 0.0000*               | 0.0000*               | 0.0000*              |
| Aggregatibacter               | 0.0043    | 0.0078 | 0.0106  | 0.0000*       | <b>0.0034</b>         | 0.0000*               | <b>0.0802</b>        |
| Atopobium                     | 0.0058    | 0.0066 | 0.0011  | 0.0000*       | <b>0.5607</b>         | 0.0000*               | 0.0000*              |
| Campylobacter                 | 0.0036    | 0.0080 | 0.0043  | <b>0.0005</b> | 0.0001*               | <b>0.2327</b>         | 0.0008*              |
| Capnocytophaga                | 0.0028    | 0.0026 | 0.0058  | 0.0000*       | <b>0.7857</b>         | 0.0000*               | <b>0.0074</b>        |
| Citrobacter                   | 0.0005    | 0.0000 | 0.0188  | 0.0000*       | <b>0.1318</b>         | 0.0000*               | 0.0000*              |
| Enterobacter                  | 0.0018    | 0.0000 | 0.2740  | 0.0000*       | <b>0.0062</b>         | 0.0000*               | 0.0000*              |
| Escherichia                   | 0.0053    | 0.0000 | 0.0522  | 0.0000*       | 0.0000*               | 0.0000*               | 0.0000*              |
| Fusobacterium                 | 0.0246    | 0.0226 | 0.0264  | <b>0.1893</b> | <b>0.4510</b>         | <b>0.1944</b>         | <b>0.1401</b>        |
| Gemella                       | 0.0188    | 0.0068 | 0.0036  | 0.0000*       | 0.0000*               | 0.0000*               | 0.0016*              |
| Granulicatella                | 0.0166    | 0.0266 | 0.0123  | 0.0000*       | 0.0000*               | <b>0.4896</b>         | 0.0000*              |
| Haemophilus                   | 0.0556    | 0.0703 | 0.0262  | 0.0000*       | 0.0004*               | 0.0000*               | 0.0000*              |
| Klebsiella                    | 0.0117    | 0.0000 | 0.0267  | 0.0000*       | 0.0000*               | 0.0000*               | 0.0000*              |
| Leptotrichia                  | 0.0057    | 0.0099 | 0.0162  | 0.0000*       | <b>0.0020</b>         | 0.0000*               | 0.0016*              |
| Megasphaera                   | 0.0039    | 0.0096 | 0.0007  | 0.0000*       | 0.0000*               | 0.0000*               | 0.0000*              |
| Neisseria                     | 0.0325    | 0.0529 | 0.0551  | 0.0000*       | 0.0000*               | 0.0000*               | <b>0.5568</b>        |
| Oribacterium                  | 0.0068    | 0.0096 | 0.0016  | 0.0000*       | <b>0.0541</b>         | 0.0000*               | 0.0000*              |
| Porphyromonas                 | 0.0106    | 0.0143 | 0.0334  | 0.0000*       | <b>0.0366</b>         | 0.0000*               | 0.0000*              |
| Prevotella                    | 0.2708    | 0.2506 | 0.1041  | 0.0000*       | <b>0.0211</b>         | 0.0000*               | 0.0000*              |
| Providencia                   | 0.0000    | 0.0000 | 0.0161  | 0.0000*       | <b>1.0000</b>         | 0.0000*               | <b>1.0000</b>        |
| Rothia                        | 0.1116    | 0.0654 | 0.0310  | 0.0000*       | 0.0000*               | 0.0000*               | 0.0000*              |
| Salmonella                    | 0.0000    | 0.0000 | 0.0054  | 0.0000*       | <b>1.0000</b>         | 0.0000*               | <b>1.0000</b>        |
| Selenomonas                   | 0.0025    | 0.0087 | 0.0031  | 0.0000*       | 0.0000*               | <b>0.1564</b>         | 0.0000*              |
| Serratia                      | 0.0000    | 0.0000 | 0.0519  | 0.0000*       | <b>1.0000</b>         | 0.0000*               | <b>1.0000</b>        |
| Streptococcus                 | 0.2754    | 0.2268 | 0.1409  | 0.0000*       | 0.0000*               | 0.0000*               | 0.0000*              |
| TM7_genera_incer<br>tae_sedis | 0.0048    | 0.0118 | 0.0033  | 0.0000*       | 0.0000*               | <b>0.0075</b>         | 0.0000*              |
| Veillonella                   | 0.0780    | 0.1175 | 0.0279  | 0.0000*       | 0.0000*               | 0.0000*               | 0.0000*              |
