# Supplementary material for: Comparative analysis of the human saliva microbiome from different climate zones: Alaska, Germany, and Africa
Source: PubMed Central journal article supplement (PMC4272767; doi:10.1186/s12866-014-0316-1), 2014-12-17

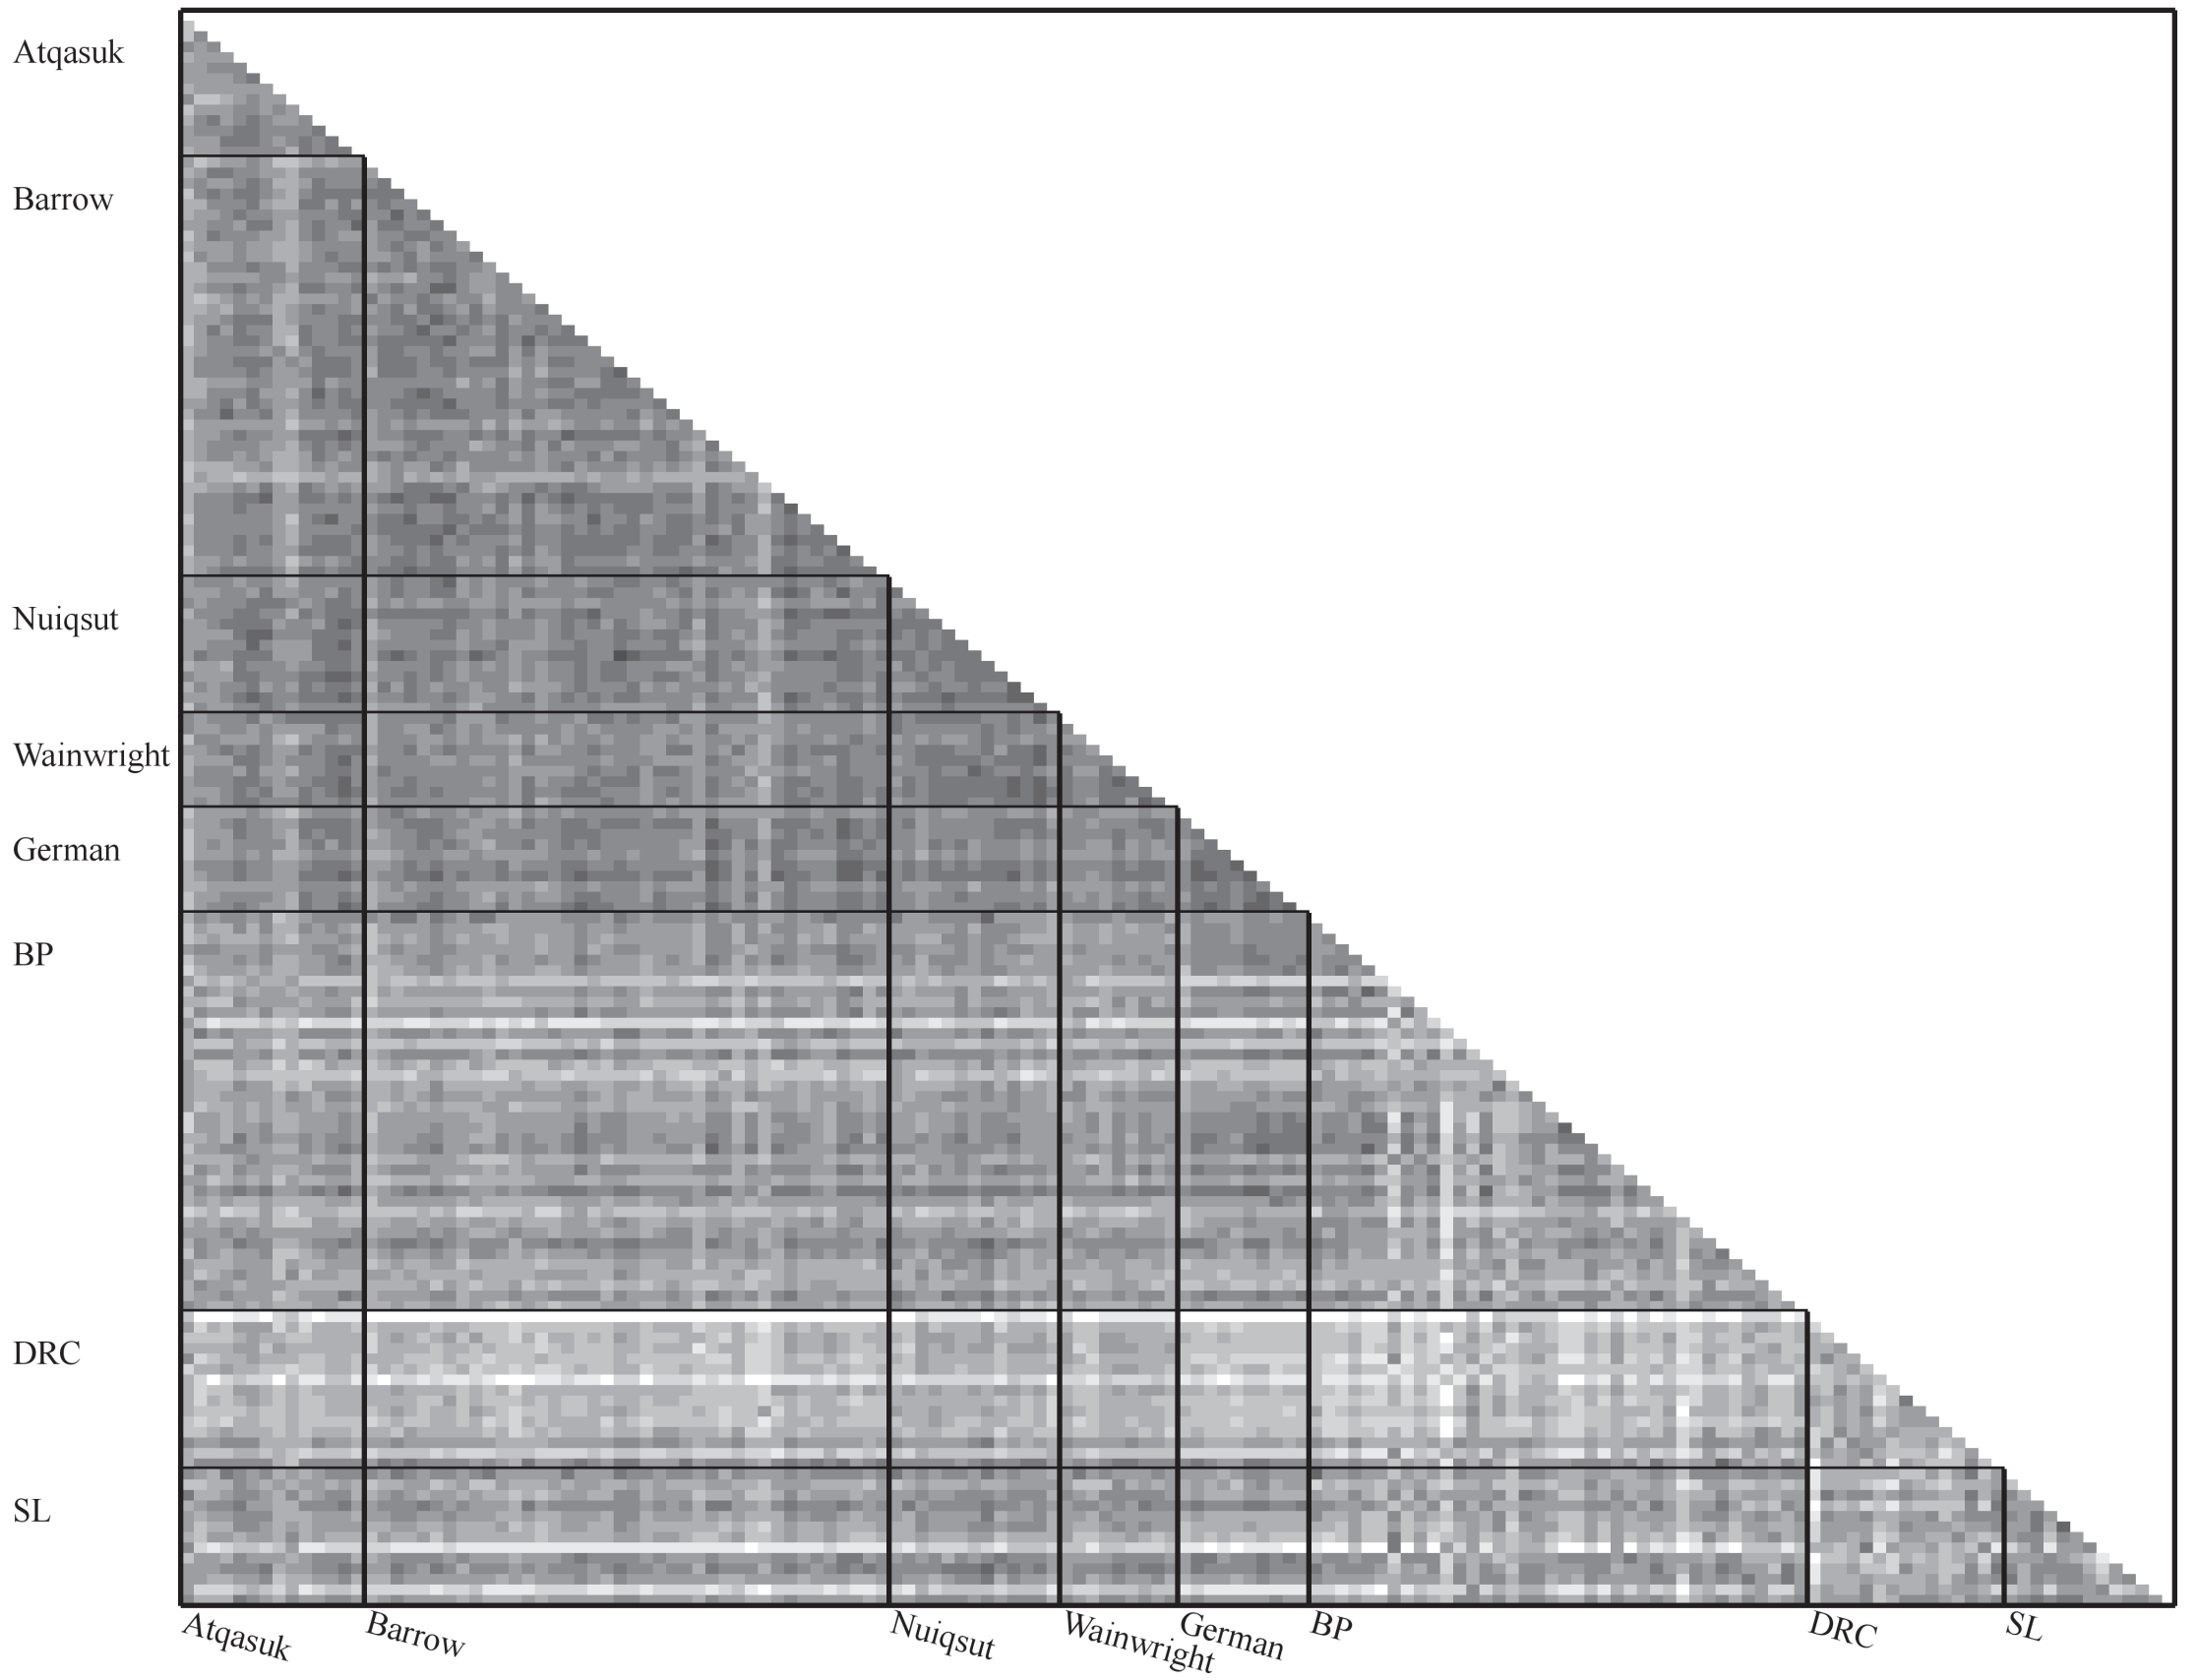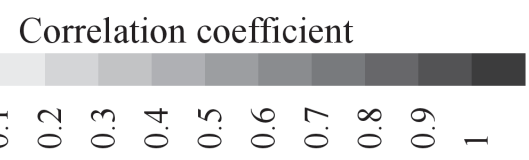

Supplement: 12866_2014_316_MOESM5_ESM.pdf [file 12866_2014_316_MOESM5_ESM.pdf]
