# Supplementary material for: Comparative analysis of the human saliva microbiome from different climate zones: Alaska, Germany, and Africa
Source: PubMed Central journal article supplement (PMC4272767; doi:10.1186/s12866-014-0316-1), 2014-12-17
Supplement: 12866_2014_316_MOESM6_ESM.pdf [file 12866_2014_316_MOESM6_ESM.pdf]

**Table S2** Number of connections

| Phylum         | No. of positive interactions |         |        |    |
|----------------|------------------------------|---------|--------|----|
|                | Alaska                       | Germany | Africa |    |
| Proteobacteria | 24                           | 15      | 16     | 16 |
| TM7            | 3                            | 5       | 3      | 3  |
| Firmicutes     | 23                           | 19      | 19     | 19 |
| Actinobacteria | 7                            | 1       | 1      | 1  |
| Fusobacterium  | 4                            | 8       | 7      | 7  |
| Bacteroidetes  | 11                           | 10      | 14     | 14 |
| Total          | 72                           | 58      | 60     |    |

| Phylum         | No. of negative interactions |         |        |    |
|----------------|------------------------------|---------|--------|----|
|                | Alaska                       | Germany | Africa |    |
| Proteobacteria | 30                           | 19      | 14     | 14 |
| TM7            | 2                            | 2       | 0      | 0  |
| Firmicutes     | 37                           | 30      | 5      | 5  |
| Actinobacteria | 9                            | 8       | 2      | 2  |
| Fusobacterium  | 7                            | 5       | 1      | 1  |
| Bacteroidetes  | 11                           | 8       | 2      | 2  |
| Total          | 96                           | 72      | 24     |    |

| Phylum         | (Positive - Negative) interactions |         |        |    |
|----------------|------------------------------------|---------|--------|----|
|                | Alaska                             | Germany | Africa |    |
| Proteobacteria | -6                                 | -4      | 2      | 2  |
| TM7            | 1                                  | 3       | 3      | 3  |
| Firmicutes     | -14                                | -11     | 14     | 14 |
| Actinobacteria | -2                                 | -7      | -1     | -1 |
| Fusobacterium  | -3                                 | 3       | 6      | 6  |
| Bacteroidetes  | 0                                  | 2       | 12     | 12 |
| Total          | -24                                | -14     | 36     |    |
