# Supplementary material for: Comparative analysis of the human saliva microbiome from different climate zones: Alaska, Germany, and Africa
Source: PubMed Central journal article supplement (PMC4272767; doi:10.1186/s12866-014-0316-1), 2014-12-17
Supplement: 12866_2014_316_MOESM9_ESM.pdf [file 12866_2014_316_MOESM9_ESM.pdf]

**Table S3** Comparison of the 56 common OTUs with the core OTUs described by Li et al, 2013 and Huse et al, 2012

(A) The taxonomy assignments and comparisons

| OUT-ID   | Assigned-phylum | Assigned-genus | Presented in Li et al, 2013 | Presented in Huse et al, 2012 |
|----------|-----------------|----------------|-----------------------------|-------------------------------|
| OTU-66   |                 | Actinomyces    | Yes                         | Yes                           |
| OTU-1261 |                 |                |                             |                               |
| OTU-68   |                 |                |                             |                               |
| OTU-73   |                 |                |                             |                               |
| OTU-289  | Actinobacteria  | Rothia         | No                          | Yes                           |
| OTU-518  |                 |                |                             |                               |
| OTU-7    |                 |                |                             |                               |
| OTU-362  |                 |                |                             |                               |
| OTU-203  |                 | Porphyromonas  | Yes                         | Yes                           |
| OTU-1162 |                 |                |                             |                               |
| OTU-2084 |                 |                |                             |                               |
| OTU-189  |                 |                |                             |                               |
| OTU-27   |                 |                |                             |                               |
| OTU-219  |                 |                |                             |                               |
| OTU-23   |                 |                |                             |                               |
| OTU-240  | Bacteroidetes   | Prevotella     | Yes                         | Yes                           |
| OTU-245  |                 |                |                             |                               |
| OTU-292  |                 |                |                             |                               |
| OTU-303  |                 |                |                             |                               |
| OTU-384  |                 |                |                             |                               |
| OTU-385  |                 |                |                             |                               |
| OTU-508  |                 |                |                             |                               |
| OTU-577  |                 |                |                             |                               |
| OTU-59   |                 |                |                             |                               |
| OTU-363  |                 | Lactobacillus  | No                          | Yes                           |
| OTU-2009 |                 |                |                             |                               |
| OTU-1169 |                 |                |                             |                               |
| OTU-1244 |                 |                |                             |                               |
| OTU-1772 |                 |                |                             |                               |
| OTU-265  |                 |                |                             |                               |
| OTU-463  |                 |                |                             |                               |
| OTU-5629 |                 |                |                             |                               |
| OTU-1166 |                 |                |                             |                               |
| OTU-117  |                 |                |                             |                               |
| OTU-1258 |                 |                |                             |                               |
| OTU-2147 |                 |                |                             |                               |
| OTU-30   | Firmicutes      | Streptococcus  | Yes                         | Yes                           |
| OTU-344  |                 |                |                             |                               |
| OTU-496  |                 |                |                             |                               |
| OTU-5    |                 |                |                             |                               |
| OTU-520  |                 |                |                             |                               |
| OTU-276  |                 |                |                             |                               |
| OTU-1469 |                 |                |                             |                               |
| OTU-1114 |                 |                |                             |                               |
| OTU-1267 |                 |                |                             |                               |
| OTU-466  |                 |                |                             |                               |
| OTU-611  |                 |                |                             |                               |
| OTU-60   |                 |                |                             |                               |
| OTU-247  |                 | Veillonella    | No                          | Yes                           |
| OTU-504  |                 |                |                             |                               |
| OTU-635  |                 |                |                             |                               |
| OTU-672  | Fusobacteria    | Fusobacterium  | Yes                         | Yes                           |
| OTU-2996 |                 | Leptotrichia   | No                          | Yes                           |
| OTU-200  |                 |                |                             |                               |
| OTU-223  | Proteobacteria  | Haemophilus    | No                          | No                            |
| OTU-201  |                 | Neisseria      | Yes                         | No                            |

(B) The summary of taxonomy assignments and comparisons

| Genus         | Number | Presented in<br>Li et al, 2013 | Presented in Huse<br>et al, 2012 |
|---------------|--------|--------------------------------|----------------------------------|
| Actinomyces   | 1      | No                             | No                               |
| Fusobacterium | 1      | No                             | Yes                              |
| Lactobacillus | 2      | No                             | No                               |
| Haemophilus   | 2      | No                             | No                               |
| Leptotrichia  | 1      | No                             | Yes                              |
| Neisseria     | 1      | No                             | No                               |
| Porphyromonas | 1      | No                             | No                               |
| Prevotella    | 15     | No                             | No                               |
| Rothia        | 7      | No                             | No                               |
| Streptococcus | 21     | Yes                            | Yes                              |
| Veillonella   | 4      | No                             | Yes                              |

| Phylum         | Number | Presented in<br>Li et al, 2013 | Presented in Huse<br>et al, 2012 |
|----------------|--------|--------------------------------|----------------------------------|
| Actinobacteria | 8      | No                             | No                               |
| Bacteroidetes  | 16     | Yes                            | Yes                              |
| Firmicutes     | 6      | Yes                            | Yes                              |
| Fusobacteria   | 2      | No                             | Yes                              |
| Proteobacteria | 24     | No                             | No                               |
