# Supplementary material for: Comparative analysis of the human saliva microbiome from different climate zones: Alaska, Germany, and Africa
Source: PubMed Central journal article supplement (PMC4272767; doi:10.1186/s12866-014-0316-1), 2014-12-17
Supplement: 12866_2014_316_MOESM10_ESM.pdf [file 12866_2014_316_MOESM10_ESM.pdf]

**Table S4** Statistics results from subsampling.

(A) Subsampled ~2500 reads from ~12 individuals from each population

| Group      | Original              |                     | Sub-sampled           |                     |                |                  |             |                         |                        |
|------------|-----------------------|---------------------|-----------------------|---------------------|----------------|------------------|-------------|-------------------------|------------------------|
|            | Number of Individuals | Number of Sequences | Number of Individuals | Number of Sequences | Number of OTUs | Number of Genera | Unknown (%) | Between individuals (%) | Within individuals (%) |
| Atkasuk    | 14                    | 2661                | 14                    | 2650                | 705            | 45               | 4.6         | 13.46                   | 86.54                  |
| Barrow     | 40                    | 10937               | 12                    | 3333                | 849            | 44               | 3.2         | 8.88                    | 91.12                  |
| Nuiqsut    | 13                    | 2972                | 13                    | 2608                | 719            | 41               | 3.7         | 8.23                    | 91.77                  |
| Wainwright | 9                     | 2905                | 9                     | 2344                | 714            | 47               | 4.1         | 6.71                    | 93.29                  |
| Germans    | 10                    | 4388                | 10                    | 2479                | 574            | 51               | 2.8         | 2.34                    | 97.66                  |
| BP         | 38                    | 22948               | 12                    | 3313                | 875            | 61               | 11.6        | 11.0                    | 89.0                   |
| DRC        | 15                    | 4503                | 15                    | 3183                | 573            | 41               | 8.0         | 42.32                   | 57.68                  |
| SL         | 13                    | 16602               | 13                    | 3593                | 768            | 43               | 10.7        | 31.48                   | 68.52                  |

(B) Subsampled 10 individuals from each group

| Group    |             | Number of Individuals | Number of Sequences | Number of OTUs | Number of Genera | Unknown (%) | Among groups (%) | Between individuals (%) | Within individuals (%) |
|----------|-------------|-----------------------|---------------------|----------------|------------------|-------------|------------------|-------------------------|------------------------|
| Alaskans |             | 76                    | 19475               | 2886           | 73               | 3.82        |                  |                         |                        |
| Germans  | Original    | 10                    | 4388                | 887            | 58               | 3.05        | 6.11             | 18.46                   | 75.43                  |
| Africans |             | 66                    | 44053               | 4145           | 108              | 10.95       |                  |                         |                        |
| Alaskans | Sub-sampled | 10                    | 2437                | 576            | 50               | 2.22        |                  |                         |                        |
| Germans  |             | 10                    | 2479                | 464            | 52               | 0.78        | 2.5              | 10.24                   | 87.26                  |
| Africans |             | 10                    | 2496                | 537            | 53               | 2.32        |                  |                         |                        |
